# Supplementary material for: Conjugated microporous polymers bearing phosphonate ligands as an efficient sorbent for potential uranium extraction from high-level liquid wastes
Source: Royal Society of Chemistry journal article supplement (doi:10.1039/c8ta02875c), 2018-01-01
Supplement: c8ta02875c1.pdf [file c8ta02875c1.pdf]

SUPPORTING INFORMATION

**Conjugated microporous polymers bearing phosphonate ligands as an efficient sorbent for potential uranium extraction from high-level liquid wastes**

Meiyun Xu <sup>a</sup>, Xiaoli Han <sup>a</sup>, Tao Wang <sup>a</sup>, Shenhua Li <sup>a</sup>, Daoben Hua <sup>a,b\*</sup>

<sup>a</sup> State Key Laboratory of Radiation Medicine and Protection, School of Radiological and Interdisciplinary Sciences (RAD-X), Soochow University, Suzhou 215123, China; correspondence to: [dbhua\\_lab@suda.edu.cn](mailto:dbhua_lab@suda.edu.cn);

<sup>b</sup> Collaborative Innovation Center of Radiological Medicine of Jiangsu Higher Education Institutions, Suzhou 215123, China.

## Table of contents

|                                    |     |
|------------------------------------|-----|
| Methods.....                       | S3  |
| Synthesis of monomer F-2.....      | S3  |
| Synthesis of CMP-H.....            | S3  |
| Sorption kinetics.....             | S3  |
| Sorption isotherms.....            | S4  |
| Thermodynamic studies.....         | S4  |
| Distribution ratio ( $K_d$ ) ..... | S5  |
| Table S1.....                      | S6  |
| Table S2.....                      | S7  |
| Table S3.....                      | S7  |
| Table S4.....                      | S8  |
| Table S5.....                      | S8  |
| Table S6.....                      | S8  |
| Table S7.....                      | S9  |
| FigureS1.....                      | S10 |
| FigureS2.....                      | S10 |
| FigureS3.....                      | S11 |
| FigureS4.....                      | S11 |
| FigureS5.....                      | S12 |
| FigureS6.....                      | S12 |
| FigureS7.....                      | S13 |
| FigureS8.....                      | S13 |
| FigureS9.....                      | S14 |
| FigureS10.....                     | S14 |
| FigureS11.....                     | S15 |
| FigureS12.....                     | S15 |
| References.....                    | S16 |

**Methods.** Transmission electron microscopy (TEM) was performed on a Tecnai G2 spirit BioTwin field emission scanning electron microscope. X-ray photoelectron spectroscopy (XPS) was carried out by an ESCALAB 250Xi spectrometer. Fourier transform infrared (FTIR) spectra were recorded on a Varian-1000 spectrometer. Solid-state  $^{13}\text{C}$  CP/MAS NMR measurements were carried out on a Bruker Avance III model 400 MHz NMR spectrometer at a MAS rate of 5 kHz. Surface areas and pore size distributions were measured by  $\text{N}_2$  sorption and desorption at 77.3 K using the ASAP 2020 volumetric sorption analyzer. BET surface areas were calculated over the relative pressure range 0.05-0.15  $P/P_0$ . Samples were degassed at 100 °C for 10 h under high vacuum before analysis. Atomic force microscope (AFM) were obtained with a Bruker Multimode 8 scanning probe microscope, operating in tapping mode with phosphorus-doped Si tips (RTESPW, Bruker). CMP-EP was dispersed in ethanol *via* sonication for 1 hour prior to AFM measurement. The concentration of uranium (VI) was determined by thermo high-resolution inductively coupled plasma mass spectrometry (ICP-MS, Element II).  $^{60}\text{Co}$  gamma-ray irradiation was carried out at  $^{60}\text{Co}$  radiation laboratory of Soochow University and institute of radiation technology of Soochow University.

**Synthesis of monomer F-2.** 2, 7-dibromo-9, 9'-bis(3-bromopropyl)-fluorene (F-1) were prepared according to reported literatures.<sup>1, 2</sup> F-1 (808.4 mg, 1.43 mmol) was refluxed in triethyl phosphite (10 mL) for 5 hours. After cooling down to room temperature, triethyl phosphite was removed through vacuum distillation. The residual was purified by flash column chromatography (4% ethanol in  $\text{CH}_2\text{Cl}_2$ ) to give F-2 (933.2 mg) in 96% yield.  $^1\text{H}$  NMR ( $\text{CDCl}_3$ , 400 MHz),  $\delta$  7.47 (6H, m), 3.92 (8H, m), 1.47 (4H, m), 1.17 (12H, t,  $J = 7.0$  Hz), 0.85 (4H, m).<sup>3</sup>

**Synthesis of CMP-H.** Nitrogen was bubbled to the DMF solution (50mL) of TBB (187.6 mg, 0.41 mmol) and 2, 7-dibromo-9H-fluorene (200 mg, 0.62 mmol) for 30 min.  $\text{Pd}(\text{PPh}_3)_4$  (31 mg, 0.03 mmol) was added into the solution followed by injection of 1 M  $\text{Na}_2\text{CO}_3$ . The reaction mixture was stirred at a predetermined temperature under  $\text{N}_2$ . After cooling down, the mixture was centrifugated (4000 rpm, 30 min), and then washed with DMF for 5 times and  $\text{CH}_2\text{Cl}_2$  for 4 times to remove unreacted monomers and impurities. The residual was dialyzed (MWCO: 8000~14000), and then freeze dried to give CMP-H (115 mg) in 87.7% yield as a white powder.

**Sorption kinetics.** Pseudo-first-order equation is described as following Equation (1):

$$\log(q_e - q_t) = \log q_e - \left(\frac{k_1}{2.303}\right) \times t \quad (1)$$

where  $q_e$  and  $q_t$  ( $\text{mg g}^{-1}$ ) are the sorption capacity of U(VI) at equilibrium time and contact time  $t$  [min], respectively, and  $k_1$  [ $\text{min}^{-1}$ ] represents the pseudo first order kinetic constant.  $q_e$  and  $k_1$  can be calculated from the slope and intercept of the plot of  $\log(q_e - q_t)$  versus  $t$ , respectively (Figure S4A).

Pseudo-second-order model is expressed as the following Equation (2):

$$\frac{t}{q_t} = \frac{1}{k_2 \times q_e^2} + \frac{t}{q_e} \quad (2)$$

where  $k_2$  [ $\text{g/mg/min}$ ] represents the rate constant of the pseudo-second order model, and can be determined from the plot of  $t/q_t$  against  $t$  (Fig. S4B).

**Sorption isotherms.** Langmuir model can be described as Equation (3):

$$\frac{C_e}{q_e} = \frac{1}{q_{\max} b} + \frac{C_e}{q_{\max}} \quad (3)$$

where  $b$  [ $\text{L mg}^{-1}$ ] is the Langmuir constant related to the affinity of binding sites, and  $q_{\max}$  [ $\text{mg g}^{-1}$ ] is the maximum sorption capacity. They can be calculated from the linear plot of  $C_e/q_e$  against  $C_e$  (Fig. S5A).

The Freundlich model<sup>1</sup> is applied for multilayer sorption, which can be described as Equation (4):

$$\log q_e = \log K_F + \frac{1}{n} \log C_e \quad (4)$$

where  $K_F$  [ $\text{mg/g (L/mg)}^{1/n}$ ] and  $n$  are the Freundlich constants related to sorption capacity and sorption intensity, respectively, which can be calculated from the linear plot of  $\log q_e$  versus  $\log C_e$  (Fig. S5B).

**Thermodynamic studies.** Three basic thermodynamic parameters, free energy change ( $\Delta G$ ), enthalpy change ( $\Delta H$ ) and entropy change ( $\Delta S$ ), were calculated according to Equation (5) and (6).<sup>4, 5</sup>

$$\ln K_a = \frac{\Delta S}{R} - \frac{\Delta H}{RT} \quad (5)$$

$$\Delta G = \Delta H - T\Delta S \quad (6)$$

where  $K_a$  is the thermodynamic attachment equilibrium constant, which is numerically equal to the Langmuir equilibrium constant  $b$  for neutral adsorbates or adsorbates with very weak charge.<sup>6</sup>  $R = 8.3145 \text{ [J (mol}\cdot\text{K)}^{-1}]$  is the universal gas constant, and  $T \text{ [K]}$  is the absolute temperature. According to Equation (5), the plot of  $\ln K_a$  vs.  $1/T$  (Fig. S9) can give the value of  $\Delta S \text{ [J (mol}\cdot\text{K)}^{-1}]$  and  $\Delta H \text{ [kJ mol}^{-1}]$ , and according to Equation (6) can get  $\Delta G \text{ (kJ mol}^{-1})$ .

**Distribution ratio ( $K_d$ ).** The distribution ratio ( $K_d$ )  $[\text{L/g}]$  is calculated according to Equation (7):

$$K_d = \frac{C_0 - C_e}{C_e} \times \frac{V}{M} \quad (7)$$

where  $C_0$  and  $C_e \text{ [mg L}^{-1}]$  are the initial and equilibrium concentration of uranyl ions, respectively.  $M \text{ [g]}$  is the weight of sorbent, and  $V \text{ [L]}$  is the volume of the testing solution.

**Table S1.** Concentrations of various elements in testing solution.

| Element                                                            | Total valence ions in 6M HNO <sub>3</sub> solution <sup>a</sup> | Conc. of metal ions in Simulated solution (ppm) |
|--------------------------------------------------------------------|-----------------------------------------------------------------|-------------------------------------------------|
| UO <sub>2</sub> (NO <sub>3</sub> ) <sub>2</sub> ·6H <sub>2</sub> O | UO <sub>2</sub> NO <sub>3</sub> <sup>+</sup>                    | 105.1                                           |
| NaNO <sub>3</sub>                                                  | Na <sup>+</sup>                                                 | 165.1                                           |
| Nd(NO <sub>3</sub> ) <sub>3</sub>                                  | NdNO <sub>3</sub> <sup>2+</sup>                                 | 88.1                                            |
| Gd(NO <sub>3</sub> ) <sub>3</sub> ·6H <sub>2</sub> O               | GdNO <sub>3</sub> <sup>2+</sup>                                 | 175.4                                           |
| La(NO <sub>3</sub> ) <sub>3</sub> ·6H <sub>2</sub> O               | LaNO <sub>3</sub> <sup>2+</sup>                                 | 99.0                                            |
| CeCl <sub>3</sub> ·7H <sub>2</sub> O                               | CeNO <sub>3</sub> <sup>2+</sup>                                 | 100.0                                           |
| ZrCl <sub>4</sub>                                                  | ZrOH <sub>3</sub> <sup>+</sup>                                  | 99.4                                            |
| SrCl <sub>2</sub> ·6H <sub>2</sub> O                               | SrNO <sub>3</sub> <sup>+</sup>                                  | 144.7                                           |
| CsNO <sub>3</sub>                                                  | Cs <sup>+</sup>                                                 | 13.5                                            |
| Ba(NO <sub>3</sub> ) <sub>2</sub>                                  | BaNO <sub>3</sub> <sup>+</sup>                                  | 105.1                                           |
| Ni(NO <sub>3</sub> ) <sub>2</sub> ·6H <sub>2</sub> O               | Ni <sub>2</sub> <sup>+</sup>                                    | 108.8                                           |
| CrCl <sub>3</sub> ·6H <sub>2</sub> O                               | Cr <sup>3+</sup>                                                | 103.0                                           |
| CoCl <sub>2</sub>                                                  | Co <sup>2+</sup>                                                | 138.9                                           |
| ZnCl <sub>2</sub>                                                  | Zn <sup>2+</sup>                                                | 109.8                                           |
| Sm(NO <sub>3</sub> ) <sub>3</sub> ·6H <sub>2</sub> O               | SmNO <sub>3</sub> <sup>2+</sup>                                 | 47.6                                            |

a: Metal species in nitric acid solution simulated by Medusa program. ([M] = concentration of metal ions in 6 M nitric acid)

**Table S2.** BET surface areas, pore volumes, pore diameter and microanalysis of networks synthesized in different conditions

|        | 1 M Na <sub>2</sub> CO <sub>3</sub><br>solution content <sup>1</sup> | Temperature<br>(°C)                    | Surface area<br>(m <sup>2</sup> g <sup>-1</sup> ) | Pore diameter<br>(nm) <sup>2</sup> |
|--------|----------------------------------------------------------------------|----------------------------------------|---------------------------------------------------|------------------------------------|
| CMP-H1 | 5%                                                                   | 90 °C for 1 days,<br>120 °C for 3 days | 40.9                                              | 4.5                                |
| CMP-H2 | 10%                                                                  | 90 °C for 1 days,<br>120 °C for 3 days | 100.6                                             | 3.2                                |
| CMP-H3 | 20%                                                                  | 90 °C for 1 days,<br>120 °C for 3 days | 20.5                                              | 2.8                                |
| CMP-H4 | 10%                                                                  | 90 °C for 1 days,<br>150 °C for 3 days | 25.9                                              | 1.4                                |
| CMP-H5 | 10%                                                                  | 100°C for 4 days                       | 48.8                                              | 3.2                                |

1: percent of DMF (V/V); 2: calculated by the nonlocal density functional theory (NLDFT) method.

**Table S3.** XPS Binding Energies, Fitting Parameters fwhm and content for CMP-EP.

| Element      | Assignment      | Binding energy (eV) | FWHM* | Content (%) |
|--------------|-----------------|---------------------|-------|-------------|
| O (1s)       | P=O             | 533.0               | 1.81  | 66.7        |
|              | P-O             | 531.8               | 1.92  | 33.3        |
| P (2p) (1/2) | PO <sub>3</sub> | 134.0               | 1.23  | 33.0        |
| P (2p) (3/2) | PO <sub>3</sub> | 133.2               | 1.22  | 67.0        |

\*: FWHM: full width at half maximum

**Table S4.** Kinetic parameters for the sorption of U(VI) by CMP-EP. (Experimental conditions:  $C_{\text{CMP-EP}}$ 

= 1.0 mg mL<sup>-1</sup>,  $C_{\text{U(VI)}} = 4 \times 10^{-5}$  mol L<sup>-1</sup>,  $C_{\text{HNO}_3} = 6$  mol L<sup>-1</sup>, and 298.15 K)

| Temperature | $q_{e,\text{exp}}$<br>(mg/g) | Pseudo-first-order            |                              |       | Pseudo-second-order |                              |       |
|-------------|------------------------------|-------------------------------|------------------------------|-------|---------------------|------------------------------|-------|
|             |                              | $k_1$<br>(min <sup>-1</sup> ) | $q_{e,\text{cal}}$<br>(mg/g) | $R^2$ | $k_2$<br>(g/min/mg) | $q_{e,\text{cal}}$<br>(mg/g) | $R^2$ |
| 298 K       | 13.7                         | 0.010                         | 2.00                         | 0.543 | 0.046               | 13.2                         | 0.998 |
| 308 K       | 9.64                         | 0.022                         | 2.01                         | 0.694 | 0.047               | 9.48                         | 0.997 |
| 318 K       | 8.88                         | 0.030                         | 2.22                         | 0.814 | 0.051               | 8.87                         | 0.997 |

**Table S5.** Langmuir and Freundlich parameters for uranium (VI) sorption on CMP-EP. (Experimental

conditions:  $C_{\text{CMP-EP}} = 1.0$  mg mL<sup>-1</sup>,  $C_{\text{U(VI)}} = 4 \times 10^{-5}$  mol L<sup>-1</sup>,  $C_{\text{HNO}_3} = 6$  mol L<sup>-1</sup>, and 298.15 K)

| Temperature | Langmuir model                 |               |       | Freundlich model                                |      |       |
|-------------|--------------------------------|---------------|-------|-------------------------------------------------|------|-------|
|             | $q_{\text{max,cal}}$<br>(mg/g) | $b$<br>(L/mg) | $R^2$ | $K_F$<br>(mol <sup>1-n</sup> L <sup>n</sup> /g) | $n$  | $R^2$ |
| 298 K       | 73.1                           | 0.099         | 0.996 | 3.42                                            | 2.05 | 0.927 |
| 308 K       | 63.2                           | 0.089         | 0.993 | 3.22                                            | 2.12 | 0.913 |
| 318 K       | 56.2                           | 0.066         | 0.994 | 2.88                                            | 2.04 | 0.917 |

**Table S6.** Thermodynamic parameters for uranium adsorption on CMP-EP.

| $\Delta H$ (KJ/mol) | $\Delta S$ (J/mol K) | $\Delta G$ (kJ/mol) |        |        |
|---------------------|----------------------|---------------------|--------|--------|
|                     |                      | 298 K               | 308 K  | 318 K  |
| -15.58              | 43.62                | -28.56              | -29.02 | -29.45 |



**Table S7.** Comparison of sorption capacity and irradiation stability on various porous sorbents in acidic condition.

| Matrix                                                                                             | Acidity              | $q_{\max}$<br>(mg g <sup>-1</sup> ) | $k_2$<br>(g mg <sup>-1</sup> min <sup>-1</sup> ) | Irradiation<br>stability | Ref.      |
|----------------------------------------------------------------------------------------------------|----------------------|-------------------------------------|--------------------------------------------------|--------------------------|-----------|
| Phosphonate-Functionalized Mesoporous Carbon                                                       | pH 4.0               | < 10                                | 0.00816                                          | -                        | 7         |
| Phosphazene-based COF                                                                              | pH 1.5               | 124                                 | 0.0019                                           | -                        | 8         |
| Phosphonate-functionalized ion-imprinted mesoporous silica                                         | 1 M HNO <sub>3</sub> | 80                                  | 0.108                                            | 500 kGy                  | 9         |
| Alkylphosphine oxides functionalized mesoporous silicas                                            | 2 M HNO <sub>3</sub> | 13.4                                | 0.003                                            | -                        | 10        |
| Mesoporous silica adsorbents bearing phosphonic acid                                               | 2 M HNO <sub>3</sub> | <40                                 | -                                                | 500 kGy                  | 11        |
| Polyetherether ketone with blended Cyanex 923                                                      | 3 M HNO <sub>3</sub> | <60                                 | -                                                | -                        | 12        |
| Merrifield chloromethylated resin with octyl(phenyl)-N,N-diisobutylcarbamoyl-methylphosphine oxide | 4 M HNO <sub>3</sub> | 228.5                               | -                                                | -                        | 13        |
| Phosphonic acid functionalized nanoporous polymer                                                  | 4 M HNO <sub>3</sub> | 100.6                               | 0.00388                                          | -                        | 14        |
| Conjugated microporous polymers bearing phosphonate ligands                                        | 6 M HNO <sub>3</sub> | 73                                  | 0.046                                            | 1,000 kGy                | This work |

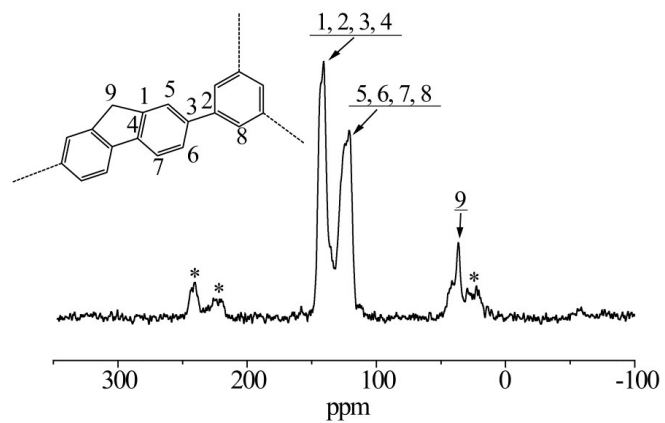

**Fig. S1** Solid-state  $^{13}\text{C}$  NMR spectra of CMP-H.

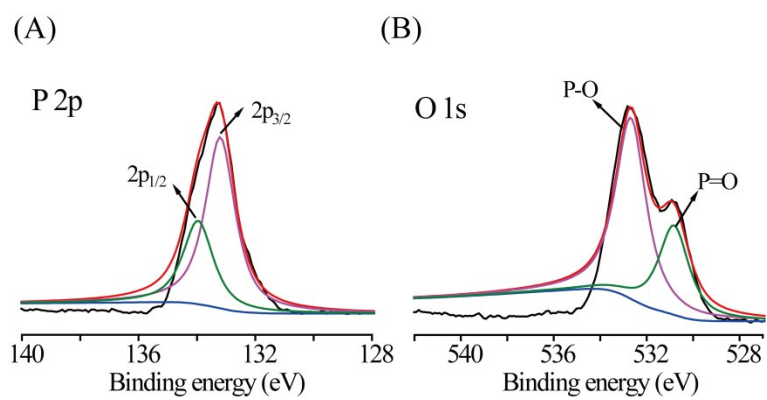

**Fig. S2** XPS (A) P 2p and (B) O 1s spectra of CMP-EP.

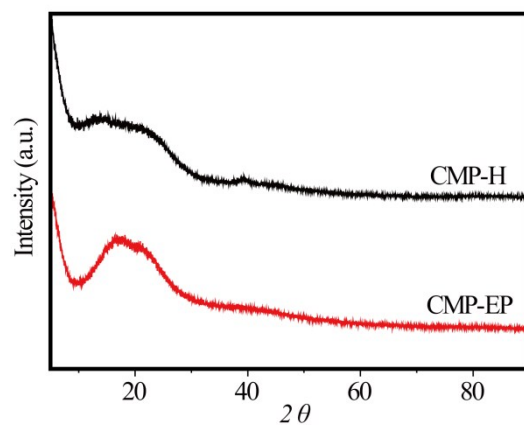

**Fig. S3** Power X-ray diffraction (PXRD) pattern of CMP-H2 and CMP-EP.

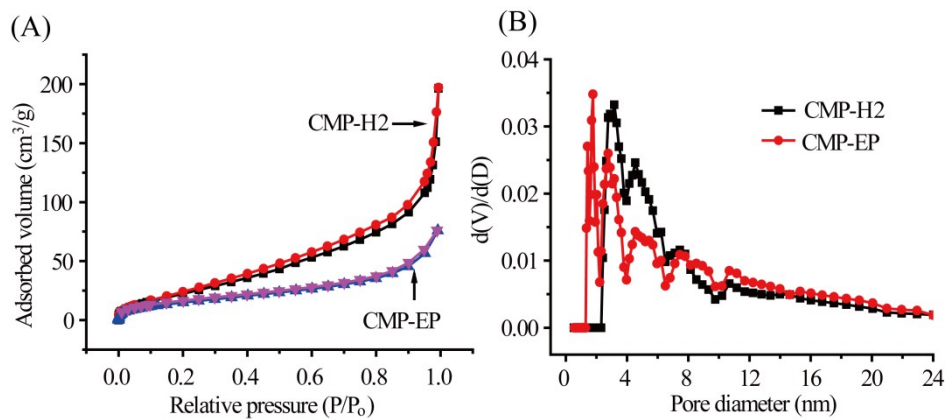

**Fig. S4** (A) Nitrogen sorption/desorption isotherms and (B) pore size distribution for CMP-H2 and CMP-EP.

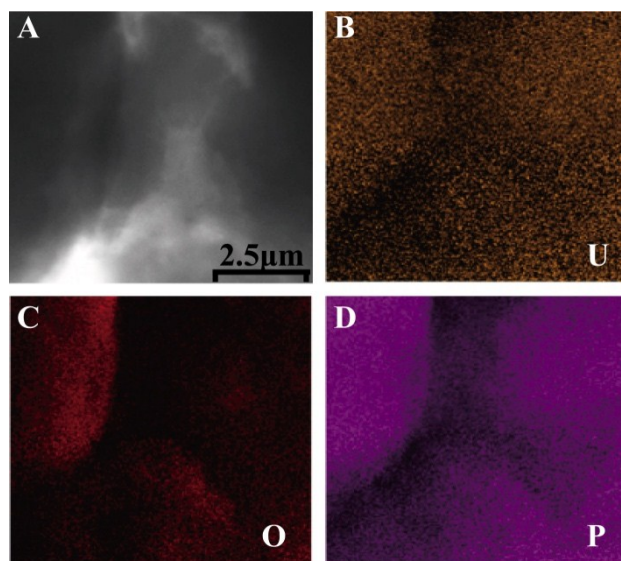

**Fig. S5** (A) HAADF-STEM image, (B) uranium, (C) oxygen, and (D) phosphorus elemental mapping of the CMP-EP-U(VI).

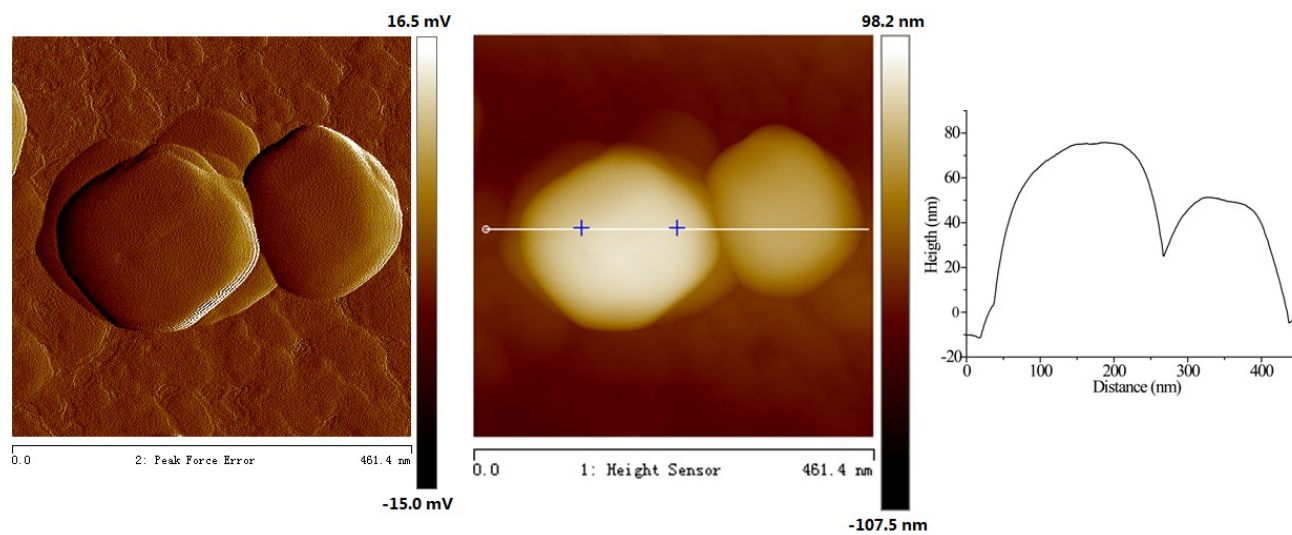

**Fig. S6** AFM topography and height images, and line analysis of CMP-EP flakes dispersed on mica.

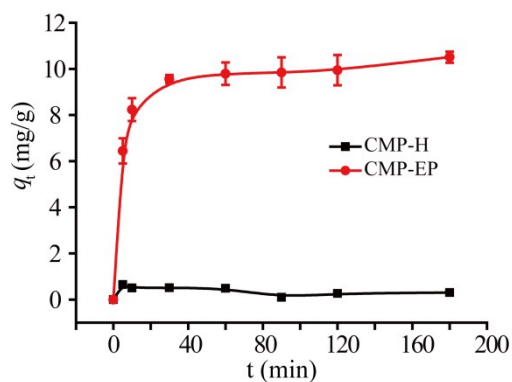

**Fig. S7** Sorption Kinetics of CMP-PE and CMP-H2 for U(VI) at 298 K. (Experimental conditions:

$C_{\text{CMP-EP}} = 1.0 \text{ mg mL}^{-1}$ ,  $C_{\text{U(VI)}} = 4 \times 10^{-5} \text{ mol L}^{-1}$ ,  $C_{\text{HNO}_3} = 6 \text{ mol L}^{-1}$ )

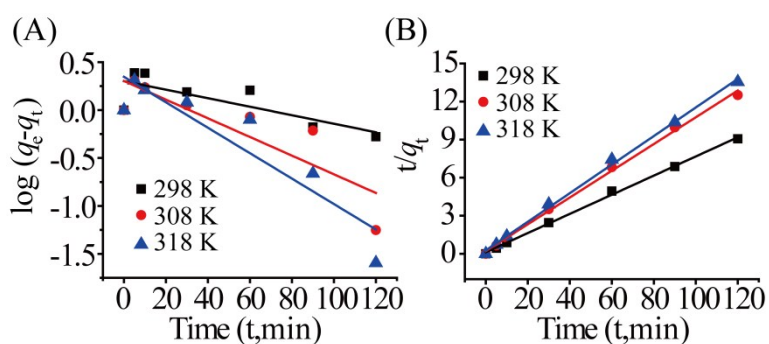

**Fig. S8** (A) Pseudo-first order kinetics and (B) Pseudo-second order kinetics of uranium (VI) sorption

on CMP-EP at 298, 308, and 318 K. (Experimental conditions:  $C_{\text{CMP-EP}} = 1.0 \text{ mg mL}^{-1}$ ,  $C_{\text{U(VI)}} = 4 \times 10^{-5} \text{ mol L}^{-1}$ ,  $C_{\text{HNO}_3} = 6 \text{ mol L}^{-1}$ )

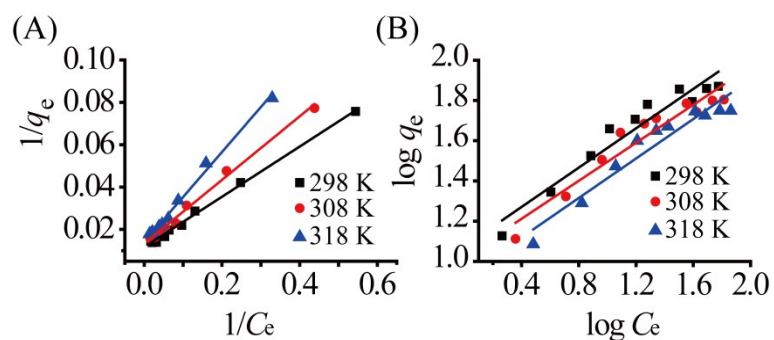

**Fig. S9** (A) Langmuir model and (B) Freundlich model of uranium (VI) sorption on CMP-EP at 298, 308, and 318 K. (Experimental conditions:  $C_{\text{CMP-EP}} = 1.0 \text{ mg mL}^{-1}$ ,  $C_{\text{U(VI)}} = 4 \times 10^{-5} \text{ mol L}^{-1}$ ,  $C_{\text{HNO}_3} = 6 \text{ mol L}^{-1}$ )

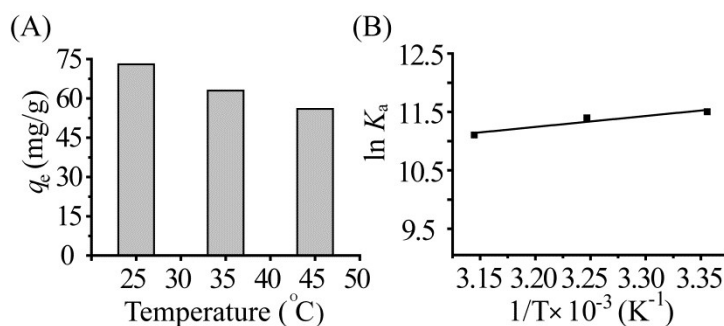

**Fig. S10** (A) The maximum uranium sorption capability ( $q_{\text{max}}$ ) of CMP-EP at different temperatures. (Experimental conditions:  $C_{\text{CMP-EP}} = 1.0 \text{ mg mL}^{-1}$ ,  $C_{\text{U(VI)}} = 4 \times 10^{-5} \text{ mol L}^{-1}$ ,  $C_{\text{HNO}_3} = 6 \text{ mol L}^{-1}$ ) (B) Linear plot of  $\ln K_a$  versus  $1/T$ .

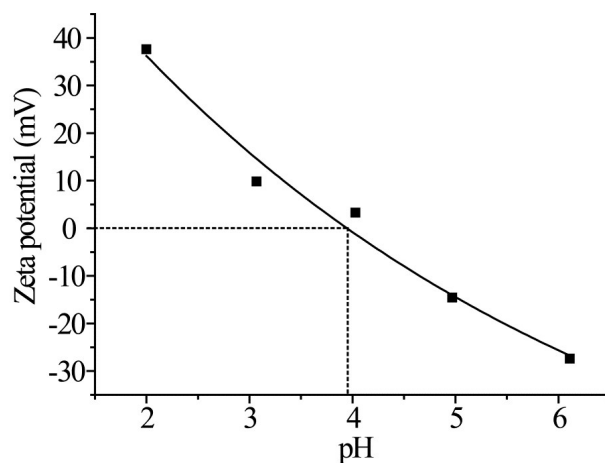

**Fig. S11** Zeta potential of CMP-EP.

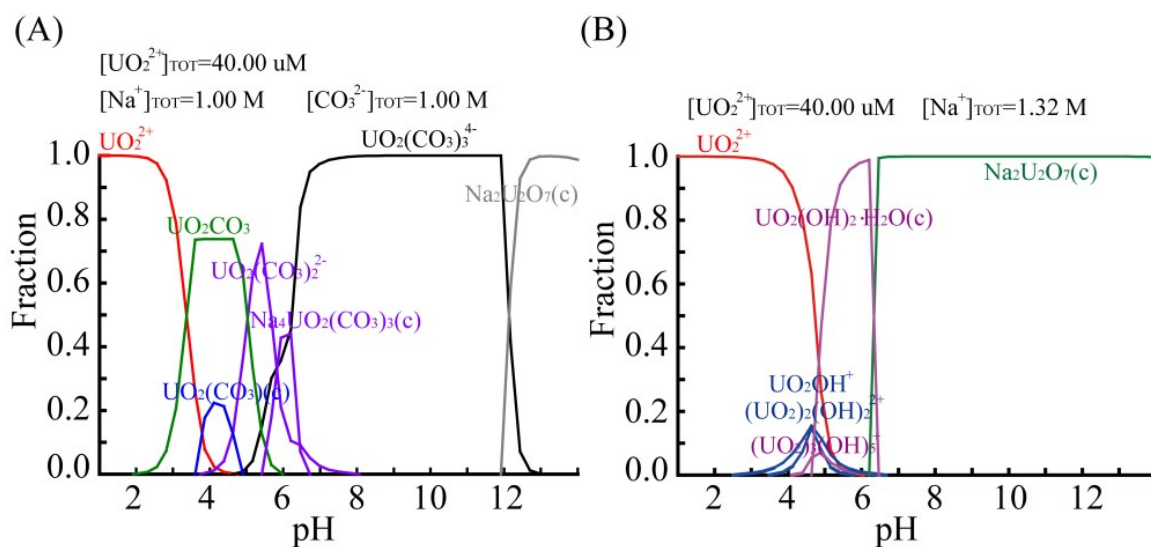

**Fig. S12** Distribution of U(VI) species in aqueous solution ( $[\text{U}] = 0.04 \text{ mmol L}^{-1}$  and pH values ranging from 1 to 14), which was simulated by Medusa program.

## References:

1. B. Liu, B. S. Gaylord, S. Wang and G. C. Bazan, *Journal of the American Chemical Society*, 2003, **125**, 6705.
2. C. Chi, A. Mikhailovsky and G. C. Bazan, *Journal of the American Chemical Society*, 2007, **129**, 11134.
3. M. I. Mangione, R. A. Spanevello, A. Rumbero, D. Heredia, G. Marzari, L. Fernandez, L. Otero and F. Fungo, *Macromolecules*, 2013, **46**, 4754.
4. E. Oguz, *Journal of Colloid and Interface Science*, 2005, **281**, 62.
5. A. Mellah, S. Chegrouche and M. Barkat, *Journal of Colloid and Interface Science*, 2006, **296**, 434.
6. Y. Liu, *Journal of Chemical & Engineering Data*, 2009, **54**, 1981.
7. M. Carboni, C. W. Abney, K. M. L. Taylor-Pashow, J. L. Vivero-Escoto and W. Lin, *Industrial & Engineering Chemistry Research*, 2013, **52**, 15187.
8. S. Zhang, X. Zhao, B. Li, C. Bai, Y. Li, L. Wang, R. Wen, M. Zhang, L. Ma and S. Li, *Journal of Hazardous Materials*, 2016, **314**, 95.
9. S. Yang, J. Qian, L. Kuang and D. Hua, *ACS applied materials & interfaces*, 2017, **9**, 29337.
10. W. Zhang, G. Ye and J. Chen, *RSC Advances*, 2016, **6**, 1210.
11. W. Zhang, G. Ye and J. Chen, *Journal of Radioanalytical and Nuclear Chemistry*, 2016, **307**, 1445.
12. R. B. Gujar, D. S. Lakshmi, A. Figoli and P. K. Mohapatra, *Journal of Chromatography A*, 2013, **1305**, 48.
13. C. Siva Kesava Raju and M. S. Subramanian, *Journal of Hazardous Materials*, 2007, **145**, 315.
14. D. Yuan, Y. Wang, Y. Qian, Y. Liu, G. Feng, B. Huang and X. Zhao, *Journal of Materials Chemistry A*, 2017, **5**, 22735.
